1 **Fine mapping using whole-genome sequencing confirms anti-Müllerian hormone as a major gene**  
2 **for sex determination in farmed Nile tilapia (*Oreochromis niloticus* L.)**

3  
4 Giovanna Cáceres<sup>1</sup>, María E. López<sup>1,2</sup>, María I. Cadiz<sup>1</sup>, Grazyella M. Yoshida<sup>1,3</sup>, Ana Jedlicki<sup>1</sup>, Ricardo  
5 Palma-Véjares<sup>4,5</sup>, Dante Travisany<sup>4,5</sup>, Diego Díaz-Domínguez<sup>4,5</sup>, Alejandro Maass<sup>4,5</sup>, Jean P. Lhorente<sup>3</sup>,  
6 Jose Soto<sup>6</sup>, Diego Salas<sup>6</sup>, José M. Yáñez<sup>1,7\*</sup>

7  
8 <sup>1</sup> Facultad de Ciencias Veterinarias y Pecuarias, Universidad de Chile, Santiago, Chile.

9 <sup>2</sup> Department of Animal Breeding and Genetics, Swedish University of Agricultural Sciences, Uppsala,  
10 Sweden.

11 <sup>3</sup> Benchmark Genetics Chile, Puerto Montt, Chile

12 <sup>4</sup> Centro para la Regulación del Genoma, Universidad de Chile, Santiago, Chile

13 <sup>5</sup> Centro de Modelamiento Matemático UMI CNRS 2807, Universidad de Chile, Santiago, Chile

14 <sup>6</sup> Grupo Acuacorporación Internacional (GACI), Cañas, Costa Rica

15 <sup>7</sup> Núcleo Milenio INVASAL, Concepción, Chile

16  
17  
18  
19 □ Correspondence:

20 Dr. José Manuel Yáñez

21 [jmayanez@uchile.cl](mailto:jmayanez@uchile.cl)

22

23

24

25 **ABSTRACT**

26

27 Nile tilapia (*Oreochromis niloticus*) is one of the most cultivated and economically important species in  
28 world aquaculture. Faster male development during grow-out phase is considered a major problem that  
29 generate heterogeneous sizes of fish at harvest. Identifying genomic regions associated with sex  
30 determination in Nile tilapia is a research topic of great interest. The objective of this study was to  
31 identify genomic variants associated with sex determination in three commercial populations of Nile  
32 tilapia. Whole-genome sequencing of 326 individuals was performed, and a total of 2.4 million high-  
33 quality bi-allelic single nucleotide polymorphisms (SNPs) were identified. A genome-wide association  
34 study (GWAS) was conducted to identify markers associated with the binary sexual trait (males = 0;  
35 females = 1). A mixed logistic regression GWAS model was fitted and a genome-wide significant signal  
36 comprising 36 SNPs, located on chromosome 23 spanning a genomic region of 536 kb, was identified.  
37 Ten out of these 36 genetic variants, intercept the anti-Müllerian hormone gene. Other significant SNPs  
38 were located in the neighboring *Amh* gene region. This gene has been strongly associated with sex  
39 determination in several vertebrate species, playing an essential role in the differentiation of male and  
40 female reproductive tissue in early stages of development. This finding provides useful information to  
41 better understand the genetic mechanisms underlying sex determination in Nile tilapia.

42

43 *Keywords: SNP, sex control, quantitative trait loci, WGS, GWAS*

44

45

## 46 INTRODUCTION

47

48 In aquaculture, many fish species of commercial interest exhibit sexual dimorphism in a variety of  
49 economically important traits such as growth rate, age at sexual maturity and carcass quality traits (Díaz  
50 et al., 2013; Martínez et al., 2014; Purcell et al., 2018). When the sexual dimorphism is relevant for  
51 production, the identification of genomic regions or markers associated to these traits is of great interest  
52 as they can be used to develop more efficient methodologies for generating monosex population. For  
53 instance, in Nile tilapia, the current methods for monosex (all-male) production populations only rely on  
54 the use of hormones (Baroiller et al., 2001; Beardmore et al., 2001; El-Sayed et al., 2012; Alcántar et al.,  
55 2014).

56

57 Teleost fish have developed a variety of sex determination mechanisms, including i) strict control due to  
58 genetic factors, ii) control by environmental factors only, or iii) interactions of both factors (Barroiller et  
59 al., 2006; Kijas et al., 2018). Genetic sex-determining systems may be chromosomal which involve one  
60 gene or master region involved in sex determination, or they may be polygenic involving several genes  
61 or multiple genomic regions (Martínez et al., 2014; Palaiokostas et al., 2015). Genomic regions  
62 associated with sex determination have been identified in some aquaculture species, including chinook  
63 salmon (*Oncorhynchus tshawytscha*) (Devlin et al., 2001), rainbow trout (*Oncorhynchus mykiss*) (Felip  
64 et al., 2005), yellow catfish (*Pelteobagrus fulvidraco*) (Wang et al., 2009), and Atlantic salmon (*Salmo  
65 salar*) (Kijas et al., 2018). In recent years, at least five genes have been identified as key factors in the  
66 gonadal differentiation pathway. For instance, the *Dmy* gene regulates sex differentiation in medaka  
67 (*Oryzias latipes*) (Matsuda et al., 2002), *Amhr2* in puffer fish fugu (*Takifugu rubripes*) (Shirak et al.,  
68 2006), *Amhy* in pathogenic silverside (*Odontesthes hatcheri*) (Hattori et al., 2012), *gsdf Y* in Luzon  
69 ricefish (*Oryzias luzonensis*) (Myosho et al., 2012), and *sdY - irf9* in rainbow trout (*Oncorhynchus  
70 mykiss*) (Yano et al., 2012a). The first four genes have been implicated in the signaling pathways for  
71 sexual differentiation of vertebrates (Herpin et al., 2005; Pan et al, 2016), while the *sdY* gene described  
72 for rainbow trout has been proposed as the master gene for sex differentiation in salmonids, which  
73 evolved from the immune system-related *irf9* gene and participates in the modulation of the interferon-9  
74 signaling pathway (Yano et al., 2012b; Pan et al, 2016 ).

75

76 In Nile tilapia, it is suggested that genetic control for sex is determined primarily by a heterogamous  
77 XX/XY male system (Beardmore, 2001). However, other genetic factors and environmental variables  
78 such as temperature may intervene in sex determination (Baroiller et al., 2001; Cnaani et al., 2008;

79 Palaiokostas et al., 2013, Wessels et al., 2014; Eshel et al., 2014). To date, different sex-linked genomic  
80 regions have been identified in Nile tilapia, including associated regions in linkage groups (LG) 1, 3, 20,  
81 and 23 (Lee et al., 2003, 2005; Shirak et al., 2006; Eshel et al., 2010; Cnaani 2013; Palaikostas et al.,  
82 2015). Most of the studies published to date have reported that the sex-determining region would be  
83 found in linkage group 1 (Lee et al., 2003; Ezaz et al., 2004; Lee et al., 2005; Lee et al., 2011;  
84 Palaiokostas et al., 2013; Palaiokostas et al., 2015). The presence of genes involved in the cascade of  
85 sexual differentiation of vertebrates have been described and mapped in this region, including Wilms  
86 tumor suppressor protein 1b (*wt1b*) and cytochrome P450 family 19 subfamily A member 1 (*cyp19a*)  
87 (Lee et al., 2007). The latter is a strong candidate for involvement in sex determination as its final  
88 product is the aromatase enzyme, which plays a crucial role in ovarian differentiation in vertebrates  
89 (Herpin et al., 2005; Ma et al., 2016).

90

91 Through quantitative trait loci (QTL) mapping by using linkage analysis Eshel et al. (2010-2012)  
92 identified a sex-determining region in LG23, which hosts the anti-Müllerian hormone (*Amh*) and the  
93 doublesex- and mab-3 related transcription factor 2 (*Dmrt2*) genes (Shirak et al., 2006). The *Amh* gene is  
94 the mediator of the regression of Müller's ducts in mammals, birds, and reptiles (Rehman et al., 2017).  
95 Müller's ducts are responsible for the development of the uterus and fallopian tubes in females during  
96 fetal development (Jamin et al., 2003; Pfenning et al., 2015), while the *Dmrt2* gene, which is a member  
97 of the *Dmrt* family of transcription factors has been suggested as an essential regulator of male  
98 development in vertebrates (Herpin et al., 2015).

99

100 The multiple sex-determining regions described for Nile tilapia support the evidence that sex  
101 differentiation is a complex trait, and it is not yet clear which specific putative causative variants are  
102 involved in regulating sex differentiation in this species. In this study, we perform a genome-wide  
103 association analysis for phenotypic sex using genotypes from a whole-genome resequencing experiment  
104 performed in 326 fish belonging to three different commercial populations of Nile tilapia. Our results  
105 provide further evidence that the *Amh* gene is a major gene associated with sex determination in this  
106 species.

107

108

109

110

111

## 112 MATERIALS AND METHODS

113

### 114 **Fish**

115 For the present study we used individuals from three commercial breeding populations established in  
116 Latin America, which are directly or indirectly related to Genetically Improved Farmed Tilapia (GIFT);  
117 the most widely cultivated Nile tilapia strain in the world. The GIFT strain was initially established in  
118 the Philippines in 1980 by the World Fish Center to initiate the first breeding program in Nile tilapia.  
119 The strain was originated using crosses between four Asian cultured strains from Israel, Singapore,  
120 Taiwan and Thailand and four strains from wild populations captured across the natural distribution of  
121 this species in Africa (Egypt, Senegal, Kenya, and Ghana) (Neira et al., 2016).

122

123 We used 59 samples from POP\_A breeding population belonging to AquaAmerica (Brazil), and 126 and  
124 141 samples from the POP\_B and POP\_C breeding populations, respectively, both belonging to  
125 Acuacorporación Internacional (ACI, Costa Rica). The Brazilian strain used to establish POP\_A was  
126 introduced to Brazil from a Malaysian breeding population in early 2005 for breeding and production  
127 purposes. The POP\_B population was generated with individuals from Asian populations in Israel,  
128 Singapore, Taiwan and Thailand present in the Philippines in the late 1980s. The POP\_B strain was  
129 imported to Costa Rica by ACI in 2005 from the aquaculture station Carmen Aquafarm (Philippines).  
130 The POP\_C was established in Philippines from the mixture of genetic material of the best available  
131 stock of GIFT populations with two original African strains that founded GIFT.

132

### 133 **DNA extraction and whole-genome sequencing**

134 Genomic DNA was extracted from a total of 326 fish samples, using the Wizard Genomic DNA  
135 purification kit, (Promega) according to manufacturer's specifications. DNA quality was evaluated by  
136 agarose gel electrophoresis and quantified by a Qubit fluorimeter (Thermo Scientific, USA). After  
137 normalization, the sequencing libraries were prepared and barcoded with the 200-cycle TruSeq sample  
138 preparation kit in pair-end format and sequenced through 66 lanes of an Illumina HiSeq 2500 machine  
139 (Illumina, USA) by a commercial supplier.

140

### 141 **Variant discovery and filtering of SNPs**

142 The SNP calling workflow was carried out as described in by Yáñez et al. (submitted). Briefly, the  
143 sequencing reads of each sample was quality controlled using FASTQC (Andrews, 2014), and then  
144 aligned to the Nile tilapia genome (Conte et al., 2017) using the BWA *mem* (Li et al., 2009; Li et al.,

145 2010) tool (predefined parameters). BAM files generated with BWA were further processed with the  
146 GATK pipeline (<https://www.broadinstitute.org/gatk/>) (McKenna et al., 2010) in order to get the set of  
147 raw SNPs.

148

149 Raw SNPs were filtered out using Vcftools software v. 0.1.15 (Danecek et al., 2011). All INDELS were  
150 removed, and SNPs that did not meet the following criteria were discarded: (1) Quality > 40, (2) non-  
151 biallelic and (3) percentage of missing genotypes > 50% across all individuals. Additionally, the  
152 following filters were applied using the GenABEL R package (Aulchenko et al., 2007): (1) minor allele  
153 frequency (MAF) < 0.05, (2) Hardy-Weinberg equilibrium (HWE) p-value > 1x 10<sup>-9</sup>, (3) SNP call rate  
154 < 0.90. Finally, samples with more than 80% of missing genotypes were also discarded. The genomic  
155 regions containing the filtered SNPs were remapped to the actual reference assembly (GenBank  
156 accession GCF\_001858045.2), using the protocol provided in Yáñez et al. (submitted).

157

### 158 **Basic population genetic statistics and differentiation**

159 The population genetic diversity and differentiation was investigated among the three populations. First,  
160 genetic differentiation between populations was measured with pairwise  $F_{ST}$  (Weir & Cockerham'S  $F_{ST}$ )  
161 estimates using Vcftools software v. 0.1.15 (Danecek et al. 2011). Second, an individual-based principal  
162 component analysis (PCA) was carried out using PLINK v1.9 (Purcell et al., 2007). Finally, the  
163 nucleotide diversity was estimated using Vcftools. We used 20 kb genomic bins with a 10 kb step  
164 window (--window-pi 20000 --window-pi-step 10000) (Kijas et al., 2018). Genetic differentiation  
165 between male and female sub-populations was analyzed using  $F_{ST}$  estimates throughout the genome  
166 using filtered SNP variants and within the region involved in the sexual determination, obtained from  
167 the association analysis, using all unfiltered SNP variants. The heterozygosity of each SNP in the sex-  
168 associated region was assessed using PLINK v1.9 (Purcell et al., 2007).

169

### 170 **Genome-wide association study**

171 GWAS was conducted using the GenABEL R package (Aulchenko et al., 2007). The phenotype for sex  
172 determination was recorded as “0” for female and “1” for male. To identify the association between  
173 SNPs and sex-determining region in Nile tilapia, a mixed logistic regression model was used, accounting  
174 for the binary nature of the sex trait (male/female). The general formula used for the logistic regression  
175 model is as follows:

176

$$\pi(x) = \frac{e^{\beta_0 + \beta_1 * \text{SNP} + \beta_2 * S}}{1 + e^{\beta_0 + \beta_1 * \text{SNP} + \beta_2 * S}}$$

177

178 Where,  $\pi(x)$  corresponds to the probability that the phenotype is male given,  $\beta_0$ : intercept,  $\beta_1 * \text{SNP}$  is the  
179 SNP effect,  $\beta_2 * S$  is the effect of the Nile tilapia strain (with three levels). The  $-\log_{10}$  (p-value) for each  
180 SNP across the genome was plotted to summarize the GWAS results. The significance threshold was  
181 determined by Bonferroni correction. A SNP was considered significant if its p-value was  $< 0.05/N$ ,  
182 where N is the number of total markers analyzed in the GWAS. At the chromosome level a SNP was  
183 considered significant if its p-value was  $< 0.05/N_c$ , where  $N_c$  is the number of markers on each particular  
184 chromosome. The proportion of heritability explained by each significant marker was obtained by  
185 comparing estimated heritability with polygenic function and estimated heritability with the inclusion of  
186 the significant SNP genotype as a factor (Korte and Farlow, 2013).

187

188

189

## 190 RESULTS

191

### 192 Quality control

193 The whole-genome sequencing (WGS) and posterior alignment of the 326 fish generated an average of  
194 76.9 million raw reads (SD = 65.0 million reads) and 76.3 million mapped reads (SD = 64.6 million  
195 mapped reads). The average coverage for each individual was 8.7X (SD = 8.9 X). From the discovery  
196 phase a total of 38,454,943 genetic variants were identified in the 326 animals. After the quality control  
197 steps, which included discarding indels, low-quality variants, exclusion of SNPs other than biallelic and  
198 genotypes called below 50% across all individuals, a total of 4,762,199 SNPs were retained. After QC  
199 including MAF, HWE, SNP and sample call rate filtering, a total of 2.4 million high-quality bi-allelic  
200 SNPs were retained in 302 samples (144 females and 158 males) for further analysis.

201

### 202 Basic population statistics and genetic structure

203 The population genetic structure was explored through Principal Component Analysis (PCA). The first  
204 two principal components represented 25% of the genetic variation. A clear differentiation is observed  
205 among the three populations analyzed in this study (Figure 1A). The PCA allowed us to distinguish  
206 between the farmed populations from Brazil (POP\_A) and Costa Rica (POP\_B and POP\_C), and also  
207 between the two populations from the latest location. The global  $F_{ST}$  among the three commercial



208 populations was 0.049. The lowest genetic differentiation was observed between the POP\_B and POP\_C  
209 ( $F_{ST}$  0.044). The analysis of nucleotide diversity among the populations revealed that the Costa Rica  
210 populations (POP\_B average  $\pi = 8.78 \times 10^{-4}$ ; POP\_C  $\pi = 8.71 \times 10^{-4}$ ), are slightly less diverse than the  
211 POP\_A population (average  $\pi = 7.93 \times 10^{-4}$ ) (Figure 1B).

212

### 213 **Genome-wide association study**

214 A genome-wide significant association signal was detected in a genomic region within chromosome 23  
215 (see Figure 2). The genomic region strongly associated with phenotypic sex identified by the mixed  
216 logistic regression model revealed 36 genome-wide significant SNPs associated with sex determination  
217 in Nile tilapia. The significant SNPs were located in a single genomic region which spanned ~ 536 kb in  
218 linkage group 23 (Table 1). The proportion of the genetic variance explained for phenotypic sex based  
219 on the significantly associated SNPs present in this region ranged from 0.4 to 0.7 (Table 1).

220

221 The genomic region of ~ 536 kb in linkage group harboring SNPs significantly associated with  
222 phenotypic sex, contains about 30 annotated genes. Some are strong candidates to play an important role  
223 in sex determination in Nile tilapia. More interesting, is that the three most significantly associated SNPs  
224 are located within the anti-Müllerian hormone gene (*Amh*), which has been linked to the differentiation  
225 process of male and female reproductive tissue in early stages of development of vertebrates and various  
226 fish species (Shirak et al., 2006; Hattori et al., 2012; Pan et al., 2016). Moreover, SNPs  
227 NC\_031986.2:34500823, NC\_031986.2:34500954 and NC\_031986.2:34501082 are found in a region of  
228 the second exon of the *Amh* gene. Markers NC\_031986.2:34502582 and NC\_031986.2:34502748 also  
229 intercept the anti-Mullerian hormone gene in exon 7, while NC\_031986.2:34502034 does so in exon 5  
230 of the *Amh* gene. The SNP NC\_031986.2:34590018 is found in an intronic region of the Elongation  
231 Factor *ELL* (Eleven-Nineteen Lysine-Rich Leukemia), which has been described as a selective co-  
232 regulator for steroid receptor functions (Pascual-Le Tallec et al., 2005; Zhou et al., 2009). SNP  
233 NC\_031986.2:34433907 is found downstream of the *Pias4* gene, protein inhibitor of activated STAT  
234 (signal transducer and activator of transcription), which inhibits the LRH-1 receptor (liver receptor  
235 homolog-1), a gene abundantly expressed in the ovary and shown to activate the transcription of steroid  
236 genes including *Cyp11a1* in granulose cells (Hsieh et al., 2009).

237

### 238 **Genetic and heterozygosity differentiation between males and females**

239 The overall  $F_{ST}$  estimate between males and females across all populations was 0.0003, indicating a very  
240 low genetic differentiation between both sub-populations. In the 536 Kb genomic region associated to



241 the sex determination located in chromosome 23 identified in this study the average  $F_{ST}$  was one order of  
242 magnitude higher (0.004) (see Figure 3). These results suggest that there is a higher degree of genetic  
243 differentiation between male and female sub-populations in this genomic region compared with the  
244 average genetic differentiation across the whole genome.

245  
246 To search for highly heterozygote loci in males (potentially XY) compared to females (potentially XX),  
247 the average heterozygosity differences (AHD) between males and females were locally calculated for  
248 each unfiltered SNP in the associated region within linkage group 23. Interestingly, we found co-  
249 localization of highly heterozygote variants in males when compared to females in the region harboring  
250 the most significant SNPs within and near the *Amh* gene (Figure 4)

251

252

253

## 254 **DISCUSSION**

255 The main objective of the present study was to identify genomic regions involved in sex determination  
256 in Nile tilapia by using a genome-wide association analysis approach based on a high density SNP panel  
257 derived from whole-genome sequencing of fish from different commercial populations. Previous studies  
258 have emphasized the complexity of determining and identifying the genomic regions associated with sex  
259 determination in Nile tilapia (*Oreochromis niloticus*). For instance, most of the markers reported to be  
260 associated with phenotypic sex have been located in different linkage groups including LG1, LG33,  
261 LG20, and LG23 (Lee et al., 2003; Ezaz et al., 2004; Lee et al., 2011; Eshel et al., 2010; Eshel et al.,  
262 2012; Palaiokostas et al., 2015). Palaiokostas et al. (2013) concluded that one of the main limitations of  
263 studies to detect sex-determining regions in *Oreochromis niloticus* was the limited number of genetic  
264 markers used in previous studies. Also, these studies only considered specific farmed Nile tilapia strains  
265 (Lee et al., 2003; Ezaz et al., 2004; Lee et al., 2005; Eshel et al., 2010).

266

267 In this study we analyzed three different farmed Nile tilapia populations which shown a low level of  
268 genetic differentiation based on the global  $F_{ST}$  estimate. This low differentiation is probably because the  
269 three Nile tilapia populations share common ancestors and are related due to the common origin of GIFT  
270 strain. The lowest genetic differentiation was observed between the POP\_B and POP\_C ( $F_{ST}$  0.044),  
271 which is concordant with the common geographical origin of these farmed populations (Costa Rica).  
272 However, the three populations clustered in three clear different groups in the PCA, indicating a patent  
273 genetic structure among the three populations.

274

275 The approach used in this study, which was based on whole-genome sequencing of males and females  
276 from three different farmed populations provided a highly dense distribution of markers covering the  
277 whole genome and a good representation of the genetic variation of this species, which in turn gave an  
278 appropriate statistical power to identify significant markers associated with the trait of interest. GWAS  
279 revealed a single genomic region in linkage group 23 that is associated with sex determination in Nile  
280 tilapia. These results are consistent with those previously reported by other authors, who have suggested  
281 that the sex determination region in Nile tilapia would be in linkage group 23 (Shirak et al., 2006;  
282 Cnaani et al., 2008; Lühmann et al. 2012; Wessels et al., 2014). Eshel et al. (2010, 2014), described a  
283 sex-associated QTL by microsatellite markers in this linkage group. While Joshi et al. (2018), using a  
284 panel of 58K SNP markers, reported that the most likely position of the sex locus would be found in the  
285 LG23. None of these studies have either the sufficient resolution or statistical power to narrow down the  
286 region to a single gene. In this study, we provide consistent evidence that polymorphism within or  
287 nearby *Amh* gene can be partially controlling sex determination in Nile tilapia.

288

289 The GWAS we performed identified 36 markers significantly associated with sex on a genome-wide  
290 basis in a single genomic region in chromosome 23. Seven markers intercept the anti-Müllerian hormone  
291 gene, which mediates the regression of Müller's ducts in several vertebrate species. The Müller ducts are  
292 responsible for the development of the uterus and fallopian tubes in females during fetal development  
293 (Jamin et al., 2013; Pfenning et al., 2015). The anti-Müllerian hormone gene has previously been  
294 considered a candidate gene for sex determination in Nile tilapia, as it is found in the sex locus (Eshel et  
295 al., 2014). Li et al. (2015) isolated a specific duplicate of *Amh*, which was designed as *Amhy*, located  
296 immediately downstream of *Amh*, whose expression was identified in males with genotype XY - YY and  
297 only during the critical sex determination period in Nile tilapia.

298

299 Some authors, including Ijiri et al. (2008) and Eshel et al. (2014), have evaluated the gene expression of  
300 the *Amh* gene during gonadal differentiation and early development in undifferentiated Nile tilapia  
301 gonads from 2 days post-fertilization; concluding that from day 5 post-fertilization the expression of the  
302 *Amh* gene increases sharply in male gonads until day 35 post-fertilization, demonstrating a crucial role  
303 of this gene in sexual differentiation. This overexpression of *Amh* in male gonads in the early stages of  
304 development has been reported in other fish species such as Japanese sole (*Paralichthys olivaceus*)  
305 (Yoshinaga et al., 2004). In the same way, the *Amh* gene in fugu pufferfish (Shirak et al., 2006) and

306 pathogenic silverside (Hattori et al., 2012) is considered the determinant genetic sex marker for both  
307 species.

308

309 It is interesting to note that the seven SNPs that intercept the *Amh* gene explain a relatively high  
310 proportion of genetic variance. SNP NC\_031986.2:34501082 intercepts the second exon in the *Amh*  
311 gene and explains 0.69 of the additive genetic variance, which confirms that the *Amh* gene is a major  
312 gene controlling sex differentiation in Nile tilapia. Taking into account the relatively high proportion of  
313 genetic variance explained by the significant markers, the findings obtained in this study suggest an  
314 important potential to incorporate molecular information to optimize methods for producing all-male  
315 populations, thereby decreasing the use of hormones that is currently the only methodology that can  
316 produce over 99% of through confirmation of genotypic sex of sex reversed animals.

317

## 318 **CONCLUSIONS**

319 This study provides further evidence to better understand the genetic architecture of sex determination in  
320 commercial Nile tilapia in strains established in Latin America. Because there is one genomic region  
321 explaining a high proportion of the genetic variance associated to phenotypic sex our results indicate that  
322 the Nile tilapia sex determination trait can be considered an oligogenic trait. Seven SNPs highly  
323 associated with sex determination intercept the anti-Müllerian hormone gene (*Amh*) providing strong  
324 evidence of *Amh* being a major gene controlling sex differentiation in Nile tilapia farmed populations.

325

326

## 327 **Acknowledgements**

328 This study was funded by CORFO grant 14EIAT-28667. GC, MIC & MEL want to acknowledge the  
329 Nacional Commission of Scientific and Technologic Research (CONICYT) for the funding through the  
330 Nacional PhD funding program (21150346-21171369). AM would like to acknowledge Conicyt-PIA  
331 Program AFB 170001 y Fondap N° 15090007 grants. Powered@NLHPC: This research was partially  
332 supported by the supercomputing infrastructure of the NLHPC (ECM-02). The authors would like to  
333 acknowledge to Aquacorporación Internacional and AquaAmerica for providing the samples used in this  
334 study. We would like to thank to Gabriel Rizzato and Natalí Kunita from AquaAmerica for their kind  
335 contribution of samples from Costa Rica and Brazil, respectively. JMY is supported by Núcleo Milenio  
336 INVASAL funded by Chile's government program, Iniciativa Científica Milenio from Ministerio de  
337 Economía, Fomento y Turismo.

## 338 **Competing Interest**

339 Jean-Paul Lhorente and Grazyella Yoshida were employed by company Benchmark Genetics Chile  
340 during the course of the study. All other authors declare no competing interests.

341

#### 342 **Data Availability**

343 The sequencing data will be deposited in public database upon acceptance.

344

#### 345 **Ethics Statement**

346 DNA sampling was carried out in accordance with the commercial practice and norms by  
347 Aquacorporación Internacional and Aquamerica.

348

#### 349 **Abbreviations**

350 AMH      Anti-Müllerian hormone  
351 GIFT      Genetically Improved Farmed Tilapia  
352 FST      Weir & Cockerham'S  $F_{ST}$   
353 LG        Linkage group  
354 GWAS     Genome Wide Association Study  
355 PCA        Principal component analysis  
356 SNP        Single nucleotide polymorphism

357

358

359

#### 360 **Authors' contributions**

361 GC performed DNA extractions, GWAS analysis and wrote the initial version of the manuscript. MEL  
362 and GMY contributed with genetic analyses and writing. MIC and AJ contributed with sample  
363 processing DNA extractions and writing. AM, DD, DT and RP contributed with bioinformatic analysis  
364 and writing. JPL contributed with study design and writing. JS and DS contributed with sampling and  
365 phenotyping. JMY conceived and designed the study, supervised the work of GC and contributed with  
366 the analysis, discussion and writing.

367

368

369

370

371 **Contributor Information**

372 Giovanna Cáceres, Email: [pdccaceres@gmail.com](mailto:pdccaceres@gmail.com)  
373 María E. López, Email: [me.lopez.dinamarca@gmail.com](mailto:me.lopez.dinamarca@gmail.com)  
374 Grazyella Yoshida, Email: [grazyoshida@hotmail.com](mailto:grazyoshida@hotmail.com)  
375 María I. Cádiz, Email: [mariaignaciadizescobar@gmail.com](mailto:mariaignaciadizescobar@gmail.com)  
376 Ana Jedlicki, Email: [jedlicki@gmail.com](mailto:jedlicki@gmail.com)  
377 Jean P. Lhorente, Email: [jean.lhorente@bmkgenetics.com](mailto:jean.lhorente@bmkgenetics.com)  
378 Alejandro Maass, Email: [amaass@dim.uchile.cl](mailto:amaass@dim.uchile.cl)  
379 Ricardo Palma, Email: [rpalmavejares@gmail.com](mailto:rpalmavejares@gmail.com)  
380 Dante Travisany, Email: [dtravisany@gmail.com](mailto:dtravisany@gmail.com)  
381 José M. Yáñez, Email: [jmayanez@uchile.cl](mailto:jmayanez@uchile.cl)  
382 José Soto, Email: [jsoto@tilapia.com](mailto:jsoto@tilapia.com)  
383 Diego Salas, Email: [dsalas@tilapia.com](mailto:dsalas@tilapia.com)  
384 Diego Díaz-Domínguez: [diediaz@dcc.uchile.cl](mailto:diediaz@dcc.uchile.cl)

385

386

387 **References**

388 Alcántar, JP .; Santos, C.; Moreno R.; Antonio, C. 2014. Manual para la Producción de supermachos de tilapia del  
389 Nilo (*Oreochromis niloticus*). UNPA- PIFI, Oaxaca. México. 81 pp.  
390 Andrews, S. 2014. FastQC A Quality Control tool for High Throughput Sequence Data.  
391 <http://www.bioinformatics.babraham.ac.uk/projects/fastqc/>.  
392 Aulchenko, Y.; De Koning, D.; Haley, C. 2007. Genome wide Rapid Association Using Mixed Model and  
393 Regression: A Fast and Simple Method for Genome-wide Pedigree-Based Quantitative Trait Loci  
394 Association Analysis. *Genetics* 177: 577-85.  
395 Baroiller, J.; D’Cotta, H. 2001. Environment and sex determination in farmed fish. *Comparative Biochemistry and*  
396 *Physiology. C: Comparative Pharmacology*, 130: 399-409.  
397 Baroiller, J.; D’Cotta, H.; Bezault, E.; Wessels, S.; Hörstegen-Schawark, G. 2006. Tilapia sex determination:  
398 Where temperature and genetics meet. *Comparative Biochemistry and Physiology, Part A* 153: 30-38.  
399 Beardome, J.; Mair, G.; Lewis, R. 2001. Monosex male production in finfish as exemplified by tilapia:  
400 applications, problems, and prospects. *Aquaculture* 197: 283-301.  
401 Cnnani, A.; Lee, B.; Zilberman, N.; Ozouf-Costaz, C.; Hulata, G.; Ron, M.; D’Hont, A.; Baroiller, J.; D’Cotta, H.;  
402 Penman, D.; Tomasio, E.; Coutanceau, J.; Perrey, E.; Shirak, A.; Kocher, T. 2008. Genetics of Sex  
403 Determination in Tilapine Species. *Sex Dev* 2:43-54.

- 404 Cnaani, A. 2013. The Tilapias Chromosomes Influencing Sex Determination. *Cytogenet Genome Res* 141:195–  
405 205.
- 406 Conte, M.; Gammerdinge, W; Bartie, K.; Penman, D.; Kocher, T. 2017. A High-Quality Assembly of the Nile  
407 Tilapia (*Oreochromis niloticus*) Genome Reveals the Structure of Two Sex Determination Regions.  
408 bioRxiv 099.564; doi: <https://doi.org/10.1101/099564>.
- 409 Danecek, P.; Auton, A.; Abecasis, G.; Albers, C.; Banks, E.; Depristo, M.; Handsaker, R.; Lunter, G.; Marth, G.;  
410 Sherry, S.; Mcvean, G.; Durbin, R. 2011. The variant call format and VCFtools. *Bioinformatics* (Oxford,  
411 UK), 27:2156–2158.
- 412 Delvin, R.; Biagi, C.; Smailus, D. 2001. Genetic mapping of Y-chromosomal DNA markers in Pacific salmon.  
413 *Genetica* 111: 43–58.
- 414 Díaz, N.; Ribas, L.; Piferrer, F. 2013. The relationship between growth and sex differentiation in the European sea  
415 bass (*Dicentrarchus labrax*). *Aquaculture* 408: 191–202.
- 416 El-Saved, A.; Abdel-Aziz, E.S.; Abdel-Ghani, H. 2012. Effects of phytoestrogens on sex reversal of Nile tilapia  
417 (*Oreochromis niloticus*) larvae fed diets treated with 17 $\alpha$ -Methyltestosterone. *Aquaculture* 360–361: 58–63.
- 418 Eshel, O.; Shirak, A.; Weller, J.; Slossman, T.; Hulata, G.; Cnaani, A.; Ron, M. 2010. Fine-mapping of a locus on  
419 linkage group 23 for sex determination in Nile tilapia (*Oreochromis niloticus*). *Animal Genetics*, 42: 222–  
420 224.
- 421 Eshel, O.; Shirak, A.; Weller, J.; Hulata, G.; RON, M. 2012. Linkage and Physical Mapping of Sex Region on  
422 LG23 of Nile Tilapia (*Oreochromis niloticus*), *G3* 2, pp. 35–42.
- 423 Eshel, O.; Shirak, A.; Dor, L.; Band, M.; Zak, T.; Markovich-Gordon, M.; Chalifa-Caspi, V.; Feldmesser, E.;  
424 Weller, J.; Seroussi, E.; Hulata, G.; Ron, M. 2014. Identification of male-specific *amh* duplication, sexually  
425 differentially expressed genes and microRNAs at early embryonic development of Nile tilapia  
426 (*Oreochromis niloticus*). *BMC Genomics* 15:774.
- 427 Ezaz, M.; Harvey, S.; Boonphakdee, C.; Teale, A.; Mcandrew, B.; Penman, D. 2004. Isolation and physical  
428 mapping of sex-linked AFLP markers in Nile tilapia (*Oreochromis niloticus* L.). *Mar. Biotechnol.* 6: 435–  
429 445.
- 430 Felip, A.; Young, W.; Wheeler, P.; Thorgaard, G. 2005. An AFLP-based approach for the identification of sex-  
431 linked markers in rainbow trout (*Oncorhynchus mykiss*). *Aquaculture* 247: 35–43.
- 432 Hattori, R.; Murai, Y.; Oura, M.; Masuda, S.; Majhi, S. et al., 2012. A Y-linked anti-Müllerian hormone  
433 duplication takes over a critical role in sex determination. *Proc Natl Acad Sci USA* 109: 2955–2959.
- 434 Herpin, A.; Schartl, M. 2015. Plasticity of gene-regulatory networks controlling sex determination: of masters,  
435 slaves, usual suspects, newcomers, and usurpators. *Embo Reports* 16: 1260–1274.
- 436 Hsieh, H.; Wang, C.; Wu, M.; Yang, F.; Tai, Y et al. 2009. PIASy inhibits LRH-1-dependent CYP11A1  
437 expression by competing for SRC-1 binding. *Biochem. J.* 419: 201–209.

- 438 Ijiri, S.; Kaneko, H.; Kobayashi, T.; Wang, D.; Sakai, F.; Prasanth, B.; Nakamura, M.; Nagahama, Y. 2008.  
439 Sexual Dimorphic Expression of Genes in Gonads During Early Differentiation of a Teleost Fish, the Nile  
440 Tilapia *Oreochromis niloticus*. *Biology of Reproduction* 78: 333-341.
- 441 Jamin, S.; Arango, N.; Mishina, Y.; Hanks, M.; Behringer, R. 2013. Genetic studies of the AMH/MIS signaling  
442 pathway for Müllerian duct regression. *Molecular and Cellular Endocrinology* 211, 15–19.
- 443 Joshi, R.; Arnyasi, M.; Lien, S.; Gjoen, H.; Alvarez, A.; Kent, M. 2018. Development and validation of 58K SNP-  
444 array and high-density linkage map in Nile tilapia (*O. niloticus*). doi: <http://dx.doi.org/10.1101/322826>.
- 445 Kijas, J.; McWilliam, S.; Sanchez, M.; Kube, P.; King, H.; Evans, B.; Nome, T.; Lien, S.; Verbyla, K. 2018.  
446 Evolution of Sex Determination Loci in Atlantic Salmon. *Scientific Reports* 8:5664 DOI:10.1038/s41598-  
447 018-23984.
- 448 Korte, A.; Farlow, A. 2013. The advantages and limitations of trait analysis with GWAS: a review. *Plant*  
449 *Methods*. 9:29.
- 450 Lee, B.; Penman, D.; Kocher, T. 2003. Identification of a sex-determining region in Nile tilapia (*Oreochromis*  
451 *niloticus*) using bulked segregant analysis. *Anim. Genet.* 34: 379–383.
- 452 Lee, B.; Lee, W.; Strelman, J.; Carleton, K.; Howe, A. et al., 2005. A second-generation genetic linkage map of  
453 tilapia (*Oreochromis* spp.). *Genetics* 170: 237–244.
- 454 Lee, B., Kocher, T. 2007. Exclusion of Wilms tumors (WT1b) and ovarian cytochrome P450 aromatase  
455 (CYP19A1) as candidates for sex determination genes in Nile tilapia (*Oreochromis niloticus*). *Anim Genet*  
456 38: 85–86.
- 457 Lee, B.; Coutanceau, J.; Ozouf-Costaz, C.; D’Cotta, H.; Barroiller, JF.; Kocher, T. 2011. Genetic and Physical  
458 Mapping of Sex-Linked AFLP Markers in Nile Tilapia (*Oreochromis niloticus*). *Mar Biotechnol* 13: 557–  
459 562.
- 460 Li, H.; Durbin, R. 2009. Fast and accurate short read alignment with Burrows- Wheeler transform.  
461 *Bioinformatics*: 25: 1754-1760.
- 462 Li, H.; Durbin, R. 2010. Fast and accurate long-read alignment with Burrows- Wheeler transform. *Bioinformatics*.  
463 26: 589-595.
- 464 Li, M.; Sun, Y.; Zhao, J.; Shi, H.; Zeng, S.; Ye, K.; Jiang, D.; Zhou, L.; Sun, L.; Tao, W.; Nagahama, Y.; Kocher,  
465 T.; Wang, D. 2015. A Tandem Duplicate of Anti-Müllerian Hormone with a Missense SNP on the Y  
466 Chromosome Is Essential for Male Sex Determination in Nile Tilapia, *Oreochromis niloticus*. *PLOS*  
467 *Genetics* DOI: 10.1371/journal.pgen.1005678.
- 468 Luhmann, L.; Knorr, C.; Horstgen-Schwark, G.; Wessels, S. 2012. First evidence for family-specific QTL for  
469 temperature-dependent sex reversal in Nile tilapia (*Oreochromis niloticus*). *Sex. Dev.* 6: 247–256.
- 470 Ma, K.; Liao, M.; Liu, F.; Ye, B.; Sun, F.; Huayue, G. 2016. Charactering the ZFAND3 gene mapped in the sex-  
471 determining locus in hybrid tilapia (*Oreochromis* spp.). *Sci. Rep.* 6, 25471; doi: 10.1038/srep25471.



- 472 Mckenna, A.; Hanna, M.; Sivachenko, A.; Cibulskis, K.; Kernytsky, A.; Garimella, K.; Altshuler, D.; Gabriel, S.;  
473 Daly, M.; Depristo, M. 2010. The Genome Analysis Toolkit: a MapReduce framework for analyzing next-  
474 generation DNA sequencing data. *Genome Res.* 20(9):1297-303.
- 475 Martínez, P.; Viñas, A.; Sánchez, L.; Díaz, N.; Ribas, L.; Piferrer, F. 2014. Genetic architecture of sex  
476 determination in fish: applications to sex ratio control in aquaculture. *Front. Genet.* 5:340.  
477 doi:10.3389/fgene.2014.00340.
- 478 Matsuda, M.; Nagahama, Y.; Shimomiya, A.; Sato, T.; Matsuda, C.; Kobayashi, T.; Morrey, C.; Shibata, N. et al.,  
479 2002. DMY is a Y- specific DM-domain gene required for male development in the medaka fish. *Nature*  
480 417: 559–563.
- 481 Myosho, T.; Otake, H.; Masuyama, H.; Matsuda, M.; Kuroki, Y. et al. 2012. Tracing the emergence of a novel  
482 sex-determining gene in medaka, *Oryzias luzonensis*. *Genetics* 191: 163–170.
- 483 Neira, R.; García, X.; Lhorente, J.; Filp, M.; Yáñez, J.; Cascante, A. 2016. Evaluation of the growth and carcass  
484 quality of diallel crosses of four strains of Nile tilapia (*Oreochromis niloticus*). *Aquaculture* 451, 213–222.
- 485 Palaiokostas, C.; Bekaert, M.; Khan, M.; Taggart, J.; Gharbi, K.; Mcandrew, B.; Penman, D. 2013. Mapping and  
486 Validation of the Major Sex-Determining Region in Nile Tilapia (*Oreochromis niloticus* L.) Using Rad  
487 Sequencing. *PLoS ONE* 8(7): e68389. doi: 10.1371/journal.pone.0068389.
- 488 Palaiokostas, C.; Bekaert, M.; Khan, M.; Taggart, J.; Gharbi, K.; Mcandrew, B.; Penman, D. 2015. A novel sex-  
489 determining QTL in Nile tilapia (*Oreochromis niloticus*). *BMC Genomics* 16:171 DOI 10.1186/s12864-  
490 015-1383.
- 491 Pan, Q.; Anderson, J.; Bertho, S.; Herpin, A.; Wilson, C.; John, H.; Postlethwait, J.; Scharl, M.; Guiguen, Y.  
492 2016. Vertebrate sex-determining genes play musical chairs. *C R Biol.* 339(7-8): 258–262.  
493 doi:10.1016/j.crv.2016.05.010.
- 494 Pascual-Le Tallec, L.; Simone, F.; Viengchareun, S.; Meduri, G.; Thirman, M.; Lombe, M. 2005. The Elongation  
495 Factor ELL (Eleven-Nineteen Lysine- Rich Leukemia) Is a Selective Coregulator for Steroid Receptor  
496 Functions. *Molecular Endocrinology* 19(5):1158–1169.
- 497 Pfenning, F.; Standke, A.; Gutzeit, H. 2015. The role of *Amh* signaling in teleost fish – Multiple functions not  
498 restricted to the gonads. *General and Comparative Endocrinology* 223: 87–107.
- 499 Purcell, C.; Seetharam, A.; Snodgrass, O.; Ortega-Garcia, S.; Hyde, J.; Severin, A. 2018. Insights into teleost sex  
500 determination from the *Seriola dorsalis* genome assembly. *BMC Genomics* DOI 10.1186/s12864-017-4403
- 501 Rehman, Z.; Worku, T.; Davis, J.; Talpur, H.; Bhattarai, D.; Kadariya, I.; Hua, G.; Cao, J.; Dad, R.; Farmanullah,  
502 Hussain, T.; Yang, L. 2017. Role and mechanism of AMH in the regulation of Sertoli cells in mice. *Journal*  
503 *of Steroid Biochemistry and Molecular Biology* 174, 133–140.
- 504 Shirak, A.; Seroussi, E.; Cnaani, A.; Howe, A.; Domokhovskiy, R.; Zilberman, N.; Kocher, T.; Hulata, G.; Ron,  
505 M. 2006. *Amh* and *Dmrta2* Genes Map to Tilapia (*Oreochromis spp.*) Linkage Group 23 Within  
506 Quantitative Trait Locus Regions for Sex Determination. *Genetics* 174: 1573–1581.

- 507 Wang, D.; Mao, H.; Chen, H.; Liu, H.; Gui, J. 2009. Isolation of Y- and X-linked SCAR markers in yellow catfish  
508 and application in the production of all-male populations. *Anim. Genet.* 40: 978–981.
- 509 Wessels, S.; Sharifi, R.; Luehmann, L.; Rueangri, S.; Krause, I.; Pach, S.; Knorr, C.; Horstgen- Schawark, G.  
510 2014. Allelic variant in the Anti-Müllerian Hormone gene leads to autosomal and temperature-dependent  
511 sex reversal in a selected tilapia line. *PLOS ONE* 9 (8), e104795.
- 512 Yano, A.; Guyomard, R.; Nicol, B.; Jouanno, E.; Quillet, E.; Klopp, C.; Cabau, C.; Bouchez, O. 2012a. An  
513 immune-related gene evolved into the master sex determining gene in rainbow trout, *Oncorhynchus mykiss*.  
514 *Curr. Biol.* 22: 1423–1428.
- 515 Yano, A.; Nicol, B.; Jouanno, E.; Quillet, E.; Fostier, A.; Guymard, R.; Guiguen, Y. 2012b. The sexually  
516 dimorphic on the Y-chromosome gene (sdY) is a conserved male-specific Y-chromosome sequence in  
517 many salmonids. *Evolutionary applications* vol. 6,3 (2012): 486-96.
- 518 Yoshinaga, N.; Shiraishi, E.; Yamamoto, T.; Iguchi, T.; Abe, S.; Kitano, T. 2004. Sexually dimorphic expression  
519 of a teleost homologue of Mullerian inhibiting substance during gonadal sex differentiation in Japanese  
520 flounder, *Paralichthys olivaceus*. *Biochemical and Biophysical Research Communications* 322: 508–513.
- 521 Zhou, J.; Feng, X.; Ban, B.; Liu, J.; Wang, Z et al. 2009 Elongation factor ELL (eleven-nineteen lysine-rich  
522 leukemia) acts as a transcription factor for direct thrombospondin-1 regulation. *J. Biol. Chem.* 284: 19142–  
523 19152.
- 524
- 525
- 526
- 527
- 528
- 529
- 530
- 531
- 532
- 533
- 534
- 535
- 536
- 537
- 538
- 539

540 **Table 1. SNP and genes significantly associated with phenotypic sex in Nile tilapia (*Oreochromis***  
 541 ***niloticus*).**

| SNP                  | LG    | Position (LG <sup>1</sup> ) | Binary sex (p-val <sup>2</sup> ) | PVAR <sup>3</sup> | Gene                      |
|----------------------|-------|-----------------------------|----------------------------------|-------------------|---------------------------|
| NC_031986.2:34501082 | LG 23 | 34501082                    | 3.03e-13                         | 0.691             | <i>Amh</i> <sup>4</sup>   |
| NC_031986.2:34502865 | LG 23 | 34502865                    | 1.28e-12                         | 0.656             |                           |
| NC_031986.2:34502864 | LG 23 | 34502864                    | 4.32e-12                         | 0.625             |                           |
| NC_031986.2:34510529 | LG 23 | 34510529                    | 8.98e-12                         | 0.619             |                           |
| NC_031986.2:34503003 | LG 23 | 34503003                    | 2.15e-11                         | 0.596             |                           |
| NC_031986.2:34502748 | LG 23 | 34502748                    | 2.43e-11                         | 0.578             | <i>Amh</i>                |
| NC_031986.2:34502756 | LG 23 | 34502756                    | 3.79e-11                         | 0.573             | <i>Amh</i>                |
| NC_031986.2:34491574 | LG 23 | 34491574                    | 6.54e-11                         | 0.578             |                           |
| NC_031986.2:34503006 | LG 23 | 34503006                    | 1.08e-10                         | 0.550             |                           |
| NC_031986.2:34512000 | LG 23 | 34512000                    | 1.38e-10                         | 0.557             |                           |
| NC_031986.2:34492336 | LG 23 | 34492336                    | 1.46e-10                         | 0.540             |                           |
| NC_031986.2:34500954 | LG 23 | 34500954                    | 2.65e-10                         | 0.524             | <i>Amh</i>                |
| NC_031986.2:34492141 | LG 23 | 34492141                    | 3.29e-10                         | 0.512             |                           |
| NC_031986.2:34689299 | LG 23 | 34689299                    | 3.43e-10                         | 0.537             |                           |
| NC_031986.2:34510584 | LG 23 | 34510584                    | 3.88e-10                         | 0.517             |                           |
| NC_031986.2:34509215 | LG 23 | 34509215                    | 4.03e-10                         | 0.531             |                           |
| NC_031986.2:34500823 | LG 23 | 34500823                    | 4.61e-10                         | 0.507             | <i>Amh</i>                |
| NC_031986.2:34501194 | LG 23 | 34501194                    | 5.84e-10                         | 0.500             | <i>Amh</i>                |
| NC_031986.2:34501574 | LG 23 | 34501574                    | 7.71e-10                         | 0.489             | <i>Amh</i>                |
| NC_031986.2:34502034 | LG 23 | 34502034                    | 8.58e-10                         | 0.498             | <i>Amh</i>                |
| NC_031986.2:34491477 | LG 23 | 34491477                    | 1.18e-09                         | 0.485             |                           |
| NC_031986.2:34787936 | LG 23 | 34787936                    | 1.21e-09                         | 0.496             |                           |
| NC_031986.2:34502582 | LG 23 | 34502582                    | 1.53e-09                         | 0.477             | <i>Amh</i>                |
| NC_031986.2:34500543 | LG 23 | 34500543                    | 1.58e-09                         | 0.486             | <i>Amh</i>                |
| NC_031986.2:34433907 | LG 23 | 34433907                    | 3.42e-09                         | 0.469             | <i>Pias4</i> <sup>5</sup> |
| NC_031986.2:34510652 | LG 23 | 34510652                    | 3.64e-09                         | 0.453             |                           |
| NC_031986.2:34504122 | LG 23 | 34504122                    | 4.28e-09                         | 0.467             |                           |
| NC_031986.2:34505919 | LG 23 | 34505919                    | 6.91e-09                         | 0.452             |                           |
| NC_031986.2:34504349 | LG 23 | 34504349                    | 1.00e-08                         | 0.444             |                           |
| NC_031986.2:34503967 | LG 23 | 34503967                    | 1.08e-08                         | 0.443             |                           |
| NC_031986.2:34510699 | LG 23 | 34510699                    | 1.10e-08                         | 0.428             |                           |
| NC_031986.2:34969977 | LG 23 | 34969977                    | 1.48e-08                         | 0.421             |                           |
| NC_031986.2:34642986 | LG 23 | 34642986                    | 1.50e-08                         | 0.419             |                           |
| NC_031986.2:34596057 | LG 23 | 34596057                    | 1.60e-08                         | 0.438             |                           |
| NC_031986.2:34590018 | LG 23 | 34590018                    | 1.83e-08                         | 0.419             | <i>ELL</i> <sup>6</sup>   |
| NC_031986.2:34502993 | LG 23 | 34502993                    | 2.07e-08                         | 0.413             |                           |

542

543 <sup>1</sup> Linkage group

544 <sup>2</sup> P-value

545 <sup>3</sup> Proportion of the genetic variance explained by SNP

546 <sup>4</sup> Anti-Müllerian hormone

547 <sup>5</sup> Protein inhibitor of activated STAT 4

548 <sup>6</sup> Elongation factor for RNA polymerase II

549

550

551 **Figure 1. Population genetic structure of males and females, and nucleotide diversity from three**  
552 **Nile tilapia (*Oreochromis niloticus*) farmed populations.** (A) Principal Components Analysis between  
553 POP\_A (green), POP\_B (red) and POP\_C (orange). Female are represented by unfilled squares and  
554 males as triangles. (B) Nucleotide diversity of POP\_A (red line), POP\_B (green line) and POP\_C (blue  
555 line).

556

557 **Figure 2. Manhattan plot for GWAS results for sex determination measured as a binary trait**  
558 **(male/female) in Nile tilapia (*Oreochromis niloticus*).** (A) The black line indicates the Bonferroni  
559 corrected threshold for genome-wide significance. Evidence for genome-wide significant association  
560 involving 36 SNPs is observed on chromosome 23. (B) The QQ-plot graph shows the relationship of the  
561 normal theoretical quantiles of the probability distributions between the expected (x-axis) and observed  
562 (y-axis)  $-\log_{10}(\text{p-values})$  plotted for each SNP associated with sex determination in Nile tilapia (dots)  
563 and the null hypothesis of no association (diagonal solid line).

564

565 **Figure 3. Genetic differentiation between male and female sub-populations in the sex-determining**  
566 **region.**  $F_{ST}$  estimates between males and females within chromosome 23, dashed red line represents the  
567 threshold for the 0.025% highest of the  $F_{ST}$  values.

568

569 **Figure 4. Regional plot of SNP associated with sex determination on chromosome 23.** (A)  
570 Unfiltered SNPs are plotted by position on the chromosome (x-axis) and the average heterozygosity  
571 difference (AHD) between males and females across all populations (y-axis). The significance ( $-\log_{10}(\text{P-value})$ ) of SNPs associated with phenotypic sex (red dots) and harboring the *Amh* gene (gray  
572 dots) is also shown (secondary y-axis). (B) The *Amh* gene and SNPs significantly associated with sex  
573 determination.  
574

575

**Figure 1.**

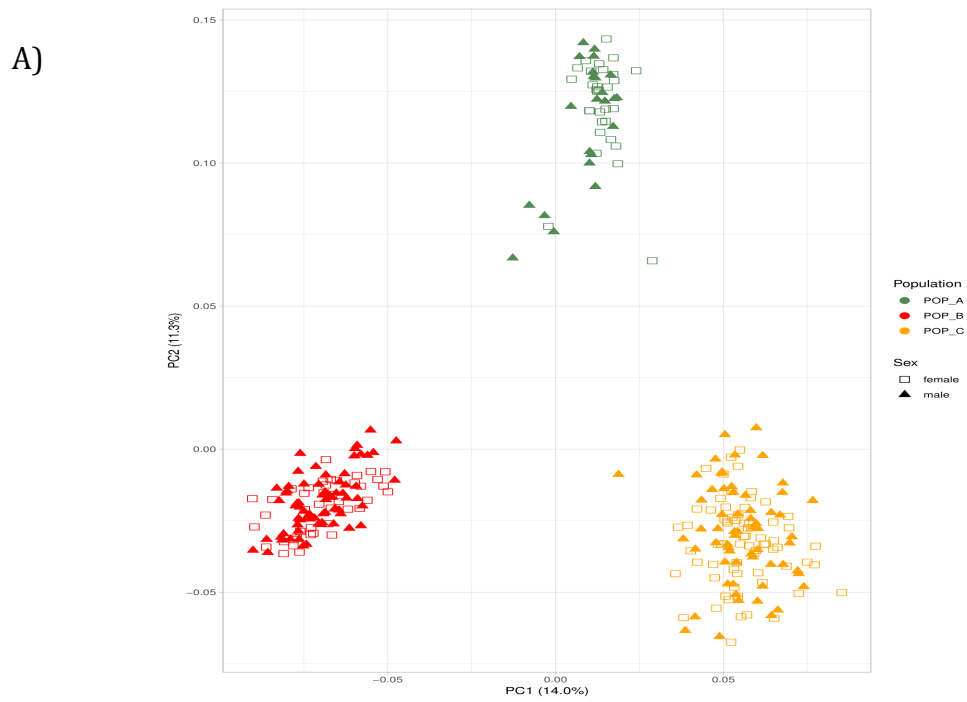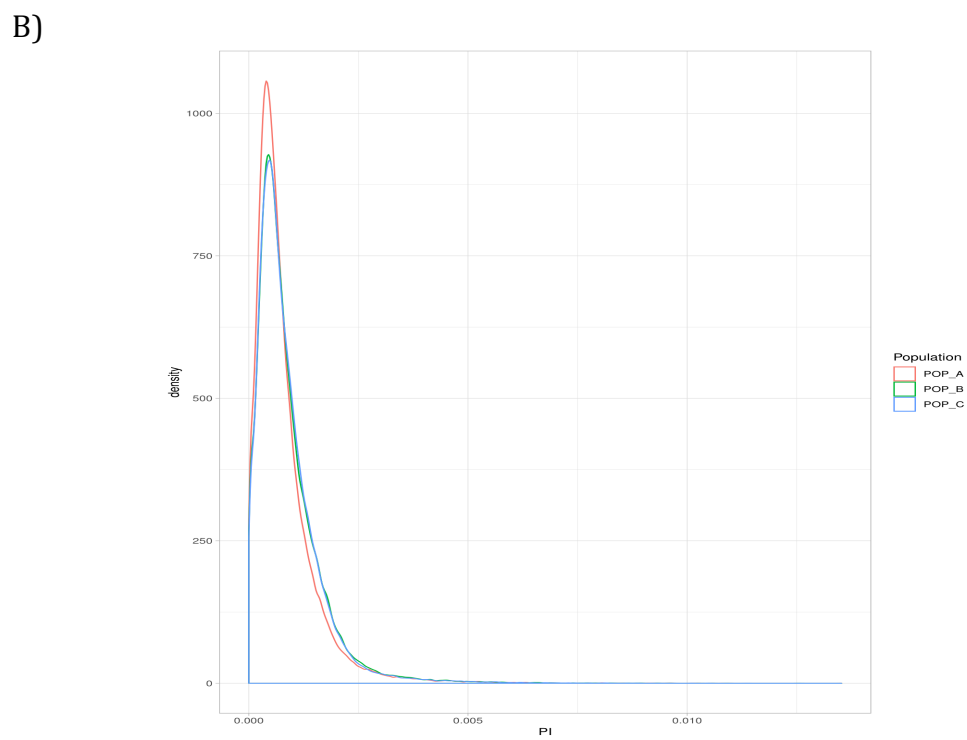

**Figure 2.**

A)

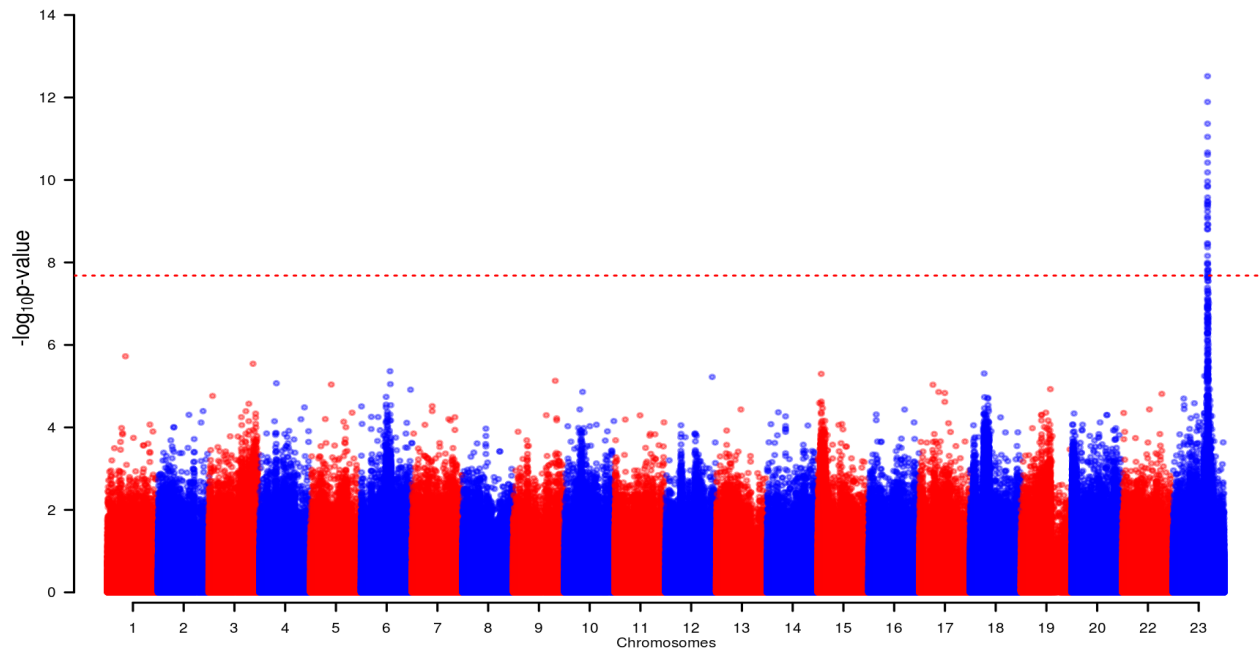

B)

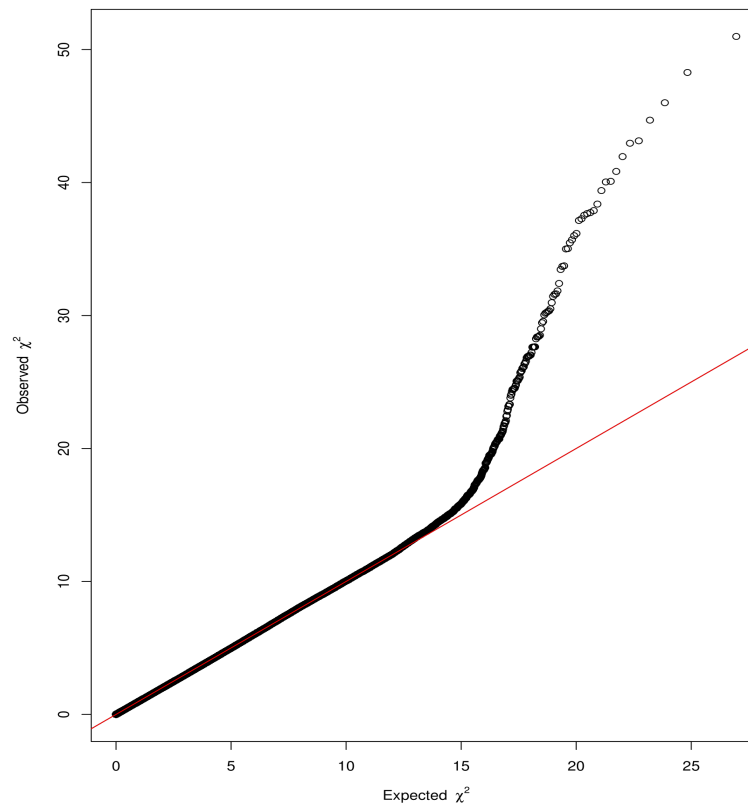



Figure 3.

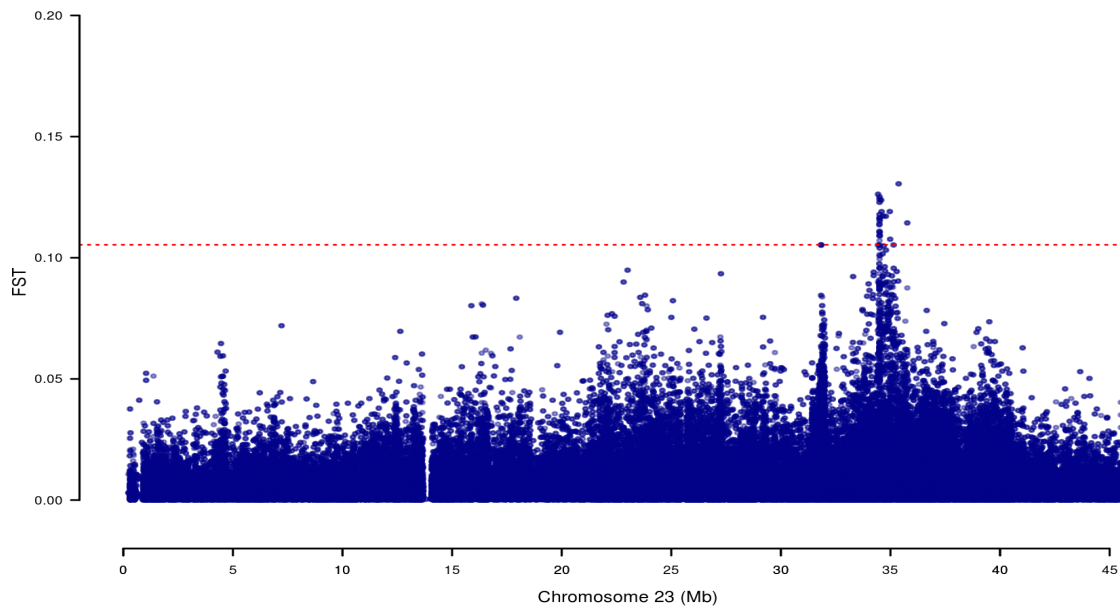

Figure 4.

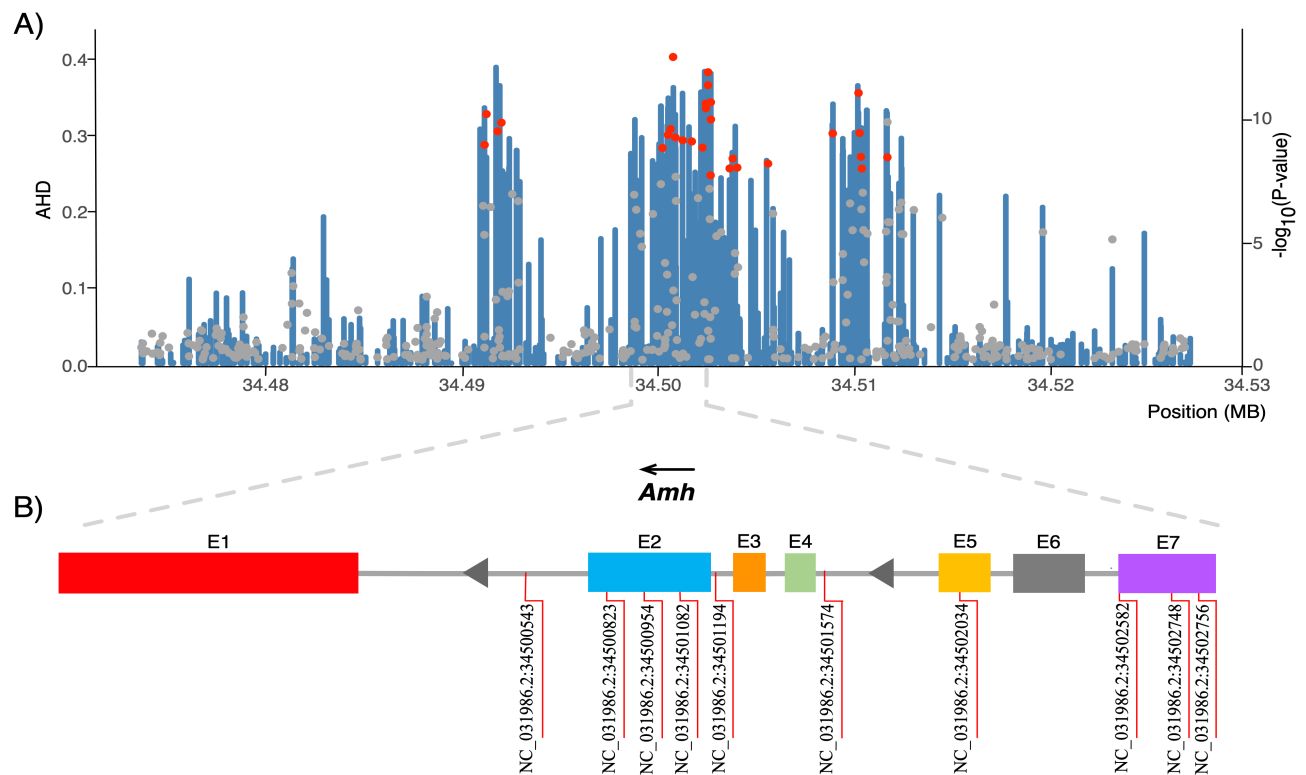

Source: http://biorxiv.org/content/10.1101/573014v1.full.pdf
